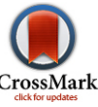

# Vascular Relaxation Induced by C-Type Natriuretic Peptide Involves the $\text{Ca}^{2+}$ /NO-Synthase/NO Pathway

Fernanda A. Andrade<sup>1</sup>, Carolina B. A. Restini<sup>2</sup>, Marcella D. Grando<sup>3</sup>, Leandra N. Z. Ramalho<sup>4</sup>, Lusiane M. Bendhack<sup>3\*</sup>

**1** Department of Pharmacology, School of Medicine of Ribeirão Preto - University of São Paulo, São Paulo, Brasil, **2** Department of Medicine - University of Ribeirão Preto, Ribeirão Preto, Brasil, **3** Department of Physics and Chemistry, Faculty of Pharmaceutical Sciences of Ribeirão Preto - University of São Paulo, São Paulo, Brasil, **4** Department of Cellular and Molecular Pathology, School of Medicine of Ribeirão Preto - University of São Paulo, São Paulo, Brasil

## Abstract

**Aims:** C-type natriuretic peptide (CNP) and nitric oxide (NO) are endothelium-derived factors that play important roles in the regulation of vascular tone and arterial blood pressure. We hypothesized that NO produced by the endothelial NO-synthase (NOS-3) contributes to the relaxation induced by CNP in isolated rat aorta via activation of endothelial NPR-C receptor. Therefore, the aim of this study was to investigate the putative contribution of NO through NPR-C activation in the CNP induced relaxation in isolated conductance artery.

**Main Methods:** Concentration-effect curves for CNP were constructed in aortic rings isolated from rats. Confocal microscopy was used to analyze the cytosolic calcium mobilization induced by CNP. The phosphorylation of the residue Ser<sup>1177</sup> of NOS was analyzed by Western blot and the expression and localization of NPR-C receptors was analyzed by immunohistochemistry.

**Key Findings:** CNP was less potent in inducing relaxation in denuded endothelium aortic rings than in intact ones. L-NAME attenuated the potency of CNP and similar results were obtained in the presence of hydroxocobalamin, an intracellular NO<sup>0</sup> scavenger. CNP did not change the phosphorylation of Ser<sup>1177</sup>, the activation site of NOS-3, when compared with control. The addition of CNP produced an increase in  $[\text{Ca}^{2+}]_c$  in endothelial cells and a decrease in  $[\text{Ca}^{2+}]_c$  in vascular smooth muscle cells. The NPR-C-receptors are expressed in endothelial and adventitial rat aortas.

**Significance:** These results suggest that CNP-induced relaxation in intact aorta isolated from rats involves NO production due to  $[\text{Ca}^{2+}]_c$  increase in endothelial cells possibly through NPR-C activation expressed in these cells. The present study provides a breakthrough in the understanding of the close relationship between the vascular actions of nitric oxide and CNP.

**Citation:** Andrade FA, Restini CBA, Grando MD, Ramalho LNZ, Bendhack LM (2014) Vascular Relaxation Induced by C-Type Natriuretic Peptide Involves the  $\text{Ca}^{2+}$ /NO-Synthase/NO Pathway. PLoS ONE 9(5): e95446. doi:10.1371/journal.pone.0095446

**Editor:** Christopher Torrens, University of Southampton, United Kingdom

**Received:** September 30, 2013; **Accepted:** March 27, 2014; **Published:** May 1, 2014

**Copyright:** © 2014 Andrade et al. This is an open-access article distributed under the terms of the Creative Commons Attribution License, which permits unrestricted use, distribution, and reproduction in any medium, provided the original author and source are credited.

**Funding:** This study was supported by FAPESP (Fundação de Apoio a Pesquisa do Estado de São Paulo), CNPq/Brazil (Conselho Nacional de Desenvolvimento Científico e Tecnológico) and CAPES (Coordenação de Aperfeiçoamento de Pessoal de Nível Superior). The funders had no role in study design, data collection and analysis, decision to publish, or preparation of the manuscript.

**Competing Interests:** The authors have declared that no competing interests exist.

\* E-mail: bendhack@usp.br

## Introduction

C-type natriuretic peptide (CNP) and nitric oxide (NO) act as synergic elements in the regulation of vascular tone and arterial blood pressure, thereby playing an important role in the maintenance of cardiovascular homeostasis [1,2]. CNP belongs to a family of natriuretic peptides, which also includes atrial natriuretic peptide (ANP), brain natriuretic peptide (BNP) and Urodilatin. CNP is abundantly present in vascular endothelial cells [3] but it is also expressed in other tissues [4]. Due to the fact that CNP is an important vasodilator with few renal actions, it has been suggested that this peptide has a function as a paracrine mediator to regulate vascular smooth muscle tone and blood flow [3,5].

Physiological effects of CNP are mainly mediated through its high affinity binding to membrane-integrated natriuretic peptide receptors NPR-B and NPR-C, which are strongly expressed in

venous tissue, aortic smooth muscle and aortic endothelial cells [6,7]. The activation of NPR-B by CNP leads to an increase in cytosolic guanosine 3',5'-cyclic monophosphate (cGMP) which mediates cellular responses [7]. On the other hand, the NPR-C that had been primarily considered as a clearance receptor is devoid of guanylyl cyclase activity and its activation by CNP can result in adenylyl cyclase inhibition through an inhibitory guanine nucleotide regulatory (G<sub>i</sub>) and/or phospholipase C (PLC) activation [8,9].

Besides, it is known that the synthesis of nitric oxide in the vascular endothelial cells also plays a key role in the regulation of vascular tone and arterial blood pressure [10]. It is well documented that endothelial production of NO is regulated by endothelial NO synthase (NOS-3) activation in response to an increase in cytosolic  $\text{Ca}^{2+}$  concentration ( $[\text{Ca}^{2+}]_c$ ) [1,11,12]. However, the activation of NOS-3 can also occur in a cytosolic

Ca<sup>2+</sup> increase-independent way [13,14]. Many studies have reported additional mechanisms of posttranslational NOS-3 activation involving, for example, its phosphorylation in Ser<sup>1177</sup> [15]. The produced NO causes vasorelaxation primarily by activating soluble guanylyl cyclase (sGC) in smooth muscle cells to increase intracellular cGMP, which in turn activates protein kinase G to induce vasorelaxation by decreasing cytosolic Ca<sup>2+</sup> concentration ([Ca<sup>2+</sup>]<sub>c</sub>) [16,1].

It has been demonstrated that the CNP-induced relaxation is partially mediated by the vascular endothelium in certain vascular beds [17,18]. Given that CNP and NO are crucial regulators of vascular tone, several studies have highlighted the possibility that the vascular effect of CNP involves activation of NOS-3 followed by NO production. This activation would be mediated by the NPR-C receptor coupled to the Gi/PLC pathway through stimulation of Ca<sup>2+</sup> influx [8,9]. In this sense, Brunner and Wolkart [18] demonstrated that CNP induces relaxation of the rat coronary resistance vessels via NO-cGMP pathway. In addition, Murthy [19] showed that NOS-3 is activated by proteins coupled to NPR-C via stimulation of Ca<sup>2+</sup> influx in gastrointestinal smooth muscle. Other authors have demonstrated that ANP and CNP interact with NPR-C receptor leading to an increase in NOS activity and NO production in cardiac ventricle and atria and aorta artery slices [20,21]. However, the relationship between the activation of the NPR-C receptor by CNP and the effects of NO in conductance artery, where the endothelium-dependent relaxation is mainly attributed to NO, is not yet well established.

We hypothesized that the relaxation induced by CNP in rat isolated aorta involves the activation of endothelial NPR-C receptor with consequent NO production by distinct mechanisms of NOS-3 activation. Therefore, the aim of this study was to investigate the putative contribution of NO through NPR-C activation in the CNP-induced relaxation in isolated conductance artery.

## Materials and Methods

### 1. Animals

Male Wistar rats (180–250 g) were maintained under standard conditions, which included 12-h light/dark cycle and free access to both food (standard rat chow) and water. The pharmacological studies were performed in strict accordance with the Ethical Principles in Animal Research adopted by Brazilian College of Animal Experimentation. The protocol was approved by the Committee on the Ethics of Animal Experiments of the School of Medicine of Ribeirão Preto - University of São Paulo (CETEA Protocol n° 071/2009). All animals were anesthetized by inhalation of isoflurane (250 uL/250 g) prior to the decapitation thus preventing any suffering of these animals.

### 2. Vessel Preparation

The rats were anesthetized and killed by decapitation. The thoracic aorta was quickly removed, dissected and cut into 4-mm-long rings. In some rings, the endothelium was mechanically removed by gently rolling the lumen of the vessel on a thin wire. The aortic rings were placed between two stainless steel stirrups and connected to an isometric force transducer (Letica Scientific Instruments, Barcelona-Spain) in order to measure the isometric tension. The rings were placed in a 10 mL organ chamber containing Krebs solution with the following composition (mmol/L): NaCl 130, KCl 4.7, KH<sub>2</sub>PO<sub>4</sub> 1.2, MgSO<sub>4</sub> 1.2, NaHCO<sub>3</sub> 14.9, glucose 5.5, and CaCl<sub>2</sub> 1.6. The solution was maintained at pH 7.4 and gassed with 95% O<sub>2</sub> and 5% CO<sub>2</sub>, at 37°C.

### 3. Functional Studies

The aortic rings were initially stretched to a basal tension of 1.5 g and allowed to equilibrate for 60 min in the bath, being washed every 15 min. In order to ensure the vascular smooth muscle functionality, the contractile response induced by 60 mmol/L KCl was tested in the resting tension of 0.5 g to 2.5 g. In our hands, the best response was obtained in 1.5 g that was standardized as the resting tension for the vascular reactivity studies. Furthermore, the aortic rings relaxed 100% in response to sodium nitroprusside and other NO donors used. Then, the aortic rings were continuously stimulated with phenylephrine 0.1 μmol/L, which is the concentration that produces half-maximal contraction (EC<sub>50</sub>), until reproducible contractile responses were obtained. Endothelial integrity was qualitatively assessed by the degree of relaxation elicited by acetylcholine (1 μmol/L) in the presence of the contractile tone induced by phenylephrine. For studies of endothelium-intact vessels, the ring was discarded if relaxation with acetylcholine was not 80% or greater. For studies of endothelium-denuded vessels, the rings were discarded if there was any degree of relaxation. The concentrations of acetylcholine and phenylephrine were selected on the basis of previous studies conducted in our laboratory.

After the equilibration period, specific protocols were performed on rat aortic rings. The aortic rings were pre-contracted with phenylephrine (0.1 μmol/L) and on top of the contractile response cumulative concentration-effect curves to CNP (0.01 nmol/L – 0.5 μmol/L) were constructed in the absence or presence of the following drugs. In order to study the effect of the inhibitors, the arterial rings were incubated for 30 min with: N<sup>G</sup>-nitro-L-arginine methyl ester (L-NAME) (a non-selective NOS inhibitor 100 μmol/L) or hydroxocobalamin (an intracellular NO<sup>0</sup> scavenger 10 μmol/L). The concentration-effect curves induced by CNP were compared to the control curves that were constructed in the absence of these drugs.

### 4. Confocal Microscopy and Image Analysis

The thoracic aortas were isolated and dissected. Cross sections of aortic rings (100 μm thick) with endothelium were placed vertically on glass coverslips covered with poly-L-lysine, in Ca<sup>2+</sup> free Hanks solution with the following composition in mmol/L: 145.0 NaCl, 5.0 KCl, 1.0 MgCl<sub>2</sub>, 0.5 NaH<sub>2</sub>PO<sub>4</sub>, 10.0 dextrose and 10.0 HEPES at pH 7.4. The slice preparations were kept in a humidified 37°C incubator gassed with 5% CO<sub>2</sub>. To assess [Ca<sup>2+</sup>]<sub>c</sub>, slice preparations were loaded with the fluorescent Ca<sup>2+</sup> dye Fluo-3 AM (10 μmol/L) for 30 min at room temperature, in Hanks solution containing 1.6 mmol/L CaCl<sub>2</sub>, at pH 7.4. Excess of dye was removed by washing out the dye with Hanks solution and allowing 30 min for intracellular desterification of Fluo-3 AM. Slice preparations were imaged in Hanks buffer (pH 7.4). [Ca<sup>2+</sup>]<sub>c</sub> was assessed by Fluo-3 AM fluorescence with a confocal scanning laser microscope (Leica TCS-SP5). It was excited with the 488 nm line of an argon ion laser, and the emitted fluorescence was measured at 510 nm. A time-course software was used to capture images of the cells at 1.014 s intervals (xyt), in the Live Data Mode acquisition at 1024×1024 pixel at 700 Hz. Using the LSCM computer software, the intensity of the intracellular maximum or minimum fluorescence was measured in the endothelial and the smooth muscle sliced regions of interest, before and after addition of CNP at the concentration considered able to induce the maximal relaxant effect (ME) reached in concentration-effect curves (EC<sub>100</sub>:0.3 μmol/L). Control responses were obtained in experiments where the vehicle (deionized water) was added instead of CNP. The initial fluorescence intensity value was obtained at t = 0 and it was designated F<sub>0</sub> and the final fluorescence intensity

value obtained after stimulation with CNP or vehicle was designated F. In this way, the percentage of the difference in fluorescence intensity (% $\Delta$ FI), which reflects the  $[Ca^{2+}]_c$  increase in endothelial cells and the decrease in smooth muscle cells, were obtained in relation to  $F_0$  (100%). It was calculated by the following formula: % $\Delta$ FI =  $(F - F_0 / F_0) \times 100$ .

## 5. Western Blot Analysis

The thoracic aortas were collected, dissected and cut into 4-mm long rings as previously described for the confocal analysis. Then the aortic rings with endothelium were submitted to the same procedures previously described for functional studies except that after the equilibration period, the aortic rings were pre-contracted with phenylephrine (0.1  $\mu$ mol/L) and on top of the contractile response the vehicle was added or CNP 0.3  $\mu$ mol/L. After CNP reached its maximum effect, rings were immediately frozen in liquid nitrogen. Each sample was homogenized in modified RIPA buffer (Tris-HCl 65.2 mmol/L; NaCl 154 mmol/L; NP-40 1% sodium deoxycolate 0.25%; EDTA 0.8 mmol/L; PMSF 1 mmol/L; Sodium orthovanadate 10 mmol/L; Sodium fluoride 100 mmol/L; Sodium Pyrophosphate 10 mmol/L and protease inhibitor) to prevent proteolysis and maintain the phosphorylation of proteins. Homogenates were centrifuged at 10,000 rpm and 4°C for 10 min to remove tissue debris. Protein concentrations in the samples were determined by Bradford method [22] (Quick Start Bradford, Bio-Rad). Protein from the tissue samples (30  $\mu$ g) were separated on 8% SDS-PAGE and transferred to a nitrocellulose membrane. Membranes were blocked for 1 h with 5% nonfat milk in Tris-buffered solution at room temperature. Membranes were incubated with rabbit primary antibody anti-NOS-3 Ser<sup>1177</sup> (1:2000, Cell signaling) overnight, at 4°C. Afterwards, membranes were incubated with a HRP-conjugated mouse anti-rabbit secondary antibody (1:1000, Santa Cruz Technology) for 1 h at room temperature. Protein bands were identified by means of chemiluminescence (ECL plus, GE Healthcare) and measured by densitometry. Expression levels of p-NOS-3 were normalized by total NOS-3.

## 6. NPR-C-receptor Expression by Immunohistochemistry

The animals were anesthetized and perfused with a buffer of 10% paraformaldehyde. The segments of isolated arteries were removed from the rats and fixed in formalin for 24 h. After this period, the segments were washed in tap water and kept in 70% alcohol. Thereafter, the artery segments were dehydrated, embedded in paraffin, cut on a microtome (4- $\mu$ m thick) and mounted on glass slides coated with poly-L-lysine. The sections were deparaffinized, rehydrated and immersed in 10 mmol/L citrate-buffer at pH 6.0 and then submitted to the recovery of heat-induced epitope (HIER) by using steam for 45 min. Then the slides were washed with phosphate buffered saline (PBS) and soaked in 3% hydrogen peroxide for 20 min to block endogenous peroxidase. The links between nonspecific proteins were blocked by incubation for 30 min with normal serum (Vectastain ABC Elite Kit, Vector Lab). Then, the slides were incubated with primary antibody for detection of NPR-C-receptor (1:100) (ABCAM, Cambridge, MA, USA) at 25°C for 2 h in a moist chamber. After washing with PBS, the slides were incubated with secondary biotinylated antibody (Vectastain ABC Elite Kit, Vector) for 30 min. They were then treated with avidin-biotin-peroxidase for more than 30 min and developed with red chromogen NovaRED Kit (Vector Lab) for 5 min. The counter-staining was carried out with Harris Hematoxylin (Biomedica). Immunostaining was considered positive when the cell membrane was homogeneously stained in red. As negative controls, all

specimens were incubated with an isotope-matched control antibody under identical conditions.

## 7. Statistical Analysis

Data are expressed as mean  $\pm$  S.E.M. In each set of experiments,  $n$  indicates the number of rats used. The values of vascular reactivity responses to CNP are expressed as percentage of the preceding contraction induced by phenylephrine. The concentration of the agonist producing a half-maximal response ( $EC_{50}$ ) was determined after *logit* transformation of the normalized concentration-response curves, and it is reported as the negative logarithm ( $-\log EC_{50} = pD_2$  values) of the mean of individual values for each tissue. The maximal relaxant effect (ME) was considered to be the maximal amplitude response reached in concentration-effect curves to CNP. Student  $t$  test was used to assess statistical differences in the Western blotting experiments. In confocal microscopy experiments, the decrease or increase in  $[Ca^{2+}]_c$  in aortic rings with endothelium stimulated with CNP was obtained from % $\Delta$  FI. Statistical significance was tested by unpaired Student  $t$  test. Values of \*,  $p < 0.05$ , \*\*,  $p < 0.01$ , and \*\*\*,  $p < 0.001$  were considered to be significant.

## 8. Drugs

Acetylcholine, phenylephrine, C-type natriuretic peptide, hydroxocobalamin and FLUO-3AM were purchased from Sigma Chemical Co. (St. Louis, MO-USA). Acetylcholine, phenylephrine and hydroxocobalamin were diluted in deionized water. C-type natriuretic peptide was dissolved in acetic acid solution 5% and diluted in deionized water. FLUO-3AM was prepared in Hanks physiological solution.

## Results

### 1. Relaxation Induced by CNP in Intact and Denuded Endothelium Rat Aorta after Contraction with Phenylephrine

The cumulative addition of CNP to the organ bath solution during the sustained contraction induced by phenylephrine was able to promote concentration-dependent relaxation with similar maximum effect in intact endothelium (ME:  $113.4 \pm 6.0\%$ ,  $n = 5$ ) and denuded endothelium aortic rings (ME:  $104.6 \pm 2.2\%$ ,  $n = 9$ ). However, in denuded endothelium aortic rings the relaxation induced by CNP was less potent as shown by the  $pD_2$  values ( $7.90 \pm 0.16$ ,  $n = 9$ ) than in intact endothelium aortic rings ( $10.74 \pm 0.95$ ,  $n = 5$ ) (Fig. 1). As shown in the Fig. 2, the contractile response induced by phenylephrine was not significantly different in denuded aorta ( $1.87 \text{ g} \pm 0.22$ ,  $n = 9$ ) and endothelium-intact aortas ( $1.45 \text{ g} \pm 0.16$ ,  $n = 5$ ,  $P = 0.16$ ). This response was not different between the data obtained after incubation with the NO-synthase inhibitor L-NAME ( $1.93 \text{ g} \pm 0.16$ ,  $n = 6$ ,  $P = 0.07$ ).

### 2. Effects of L-NAME and Hydroxocobalamin on the Relaxation Induced by CNP in Intact Endothelium Aortic Rings

Incubation with the NOS inhibitor, L-NAME, or the NO scavenger, hydroxocobalamin, did not alter the contractile response induced by phenylephrine. The maximum relaxation induced by CNP was not altered by L-NAME (in the presence:  $103.6 \pm 1.6\%$ ,  $n = 6$  and in the absence of L-NAME:  $113.4 \pm 6.0\%$ ,  $n = 5$ ). However, L-NAME significantly attenuated the potency of CNP ( $pD_2: 8.40 \pm 0.20$ ,  $n = 6$ ) when compared to CNP-relaxation in the absence of L-NAME ( $pD_2: 10.74 \pm 0.95$ ,  $n = 5$ ) (Fig. 3A). Similar results were obtained in the presence of hydroxocobal-

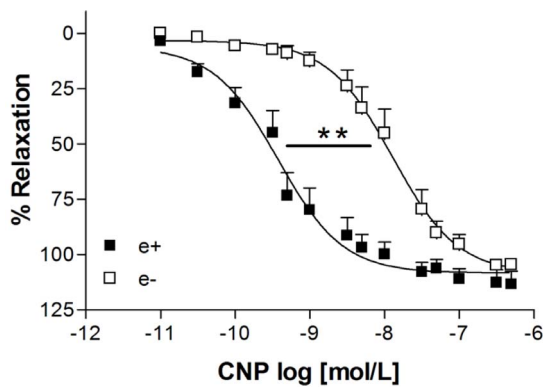

**Figure 1. Relaxation induced by CNP in intact endothelium (e<sup>+</sup>) and denuded endothelium (e<sup>-</sup>) aortic rings after contraction with phenylephrine.** Responses are represented as the percentage of the relaxation induced by CNP on the contraction with phenylephrine (0.1 μmol/L). Data are means ± SEM of at least five experiments. \*\*P < 0.01 for pD<sub>2</sub> values were obtained for e<sup>-</sup> vs. e<sup>+</sup> rat aortic rings (Student t test).  
doi:10.1371/journal.pone.0095446.g001

amin. The maximum effect was not altered by hydroxocobalamin (ME: 104.3±1.9%, n = 5) when compared with the maximum

effect observed with CNP in the absence of hydroxocobalamin (ME = 113.4±6.0%, n = 5). On the other hand, hydroxocobalamin attenuated the potency of the CNP in intact endothelium aortic rings (pD<sub>2</sub> in the presence of hydroxocobalamin: 7.90±0.09, n = 5) (Fig. 3B). In fact, similar values of potency for CNP were obtained in aortic rings with intact endothelium in the presence of L-NAME or hydroxocobalamin and in denuded endothelium aortic rings (open symbol in the Fig. 1 and Fig. 3A and Fig. 3B).

### 3. NOS-3 Phosphorylation

We analyzed the phosphorylation state on Ser<sup>1177</sup> site of NOS-3 by Western blot. CNP did not change the phosphorylation of the activation site of NOS-3, Ser<sup>1177</sup>, when compared with the control in the absence of CNP (Fig. 4).

### 4. Cytosolic Ca<sup>2+</sup> Increase in Endothelial Cells and Cytosolic Ca<sup>2+</sup> Decrease in Smooth Muscle Cells Induced by CNP

The fluorescence images at 488 nm were taken at confocal planes adjusted at nearly 0 and 10 μm from the bottom of the tissue. In such images of the aorta in the plane at 10 μm, both endothelial cells and vascular smooth muscle cells were simultaneously observed, and they could be readily distinguished from

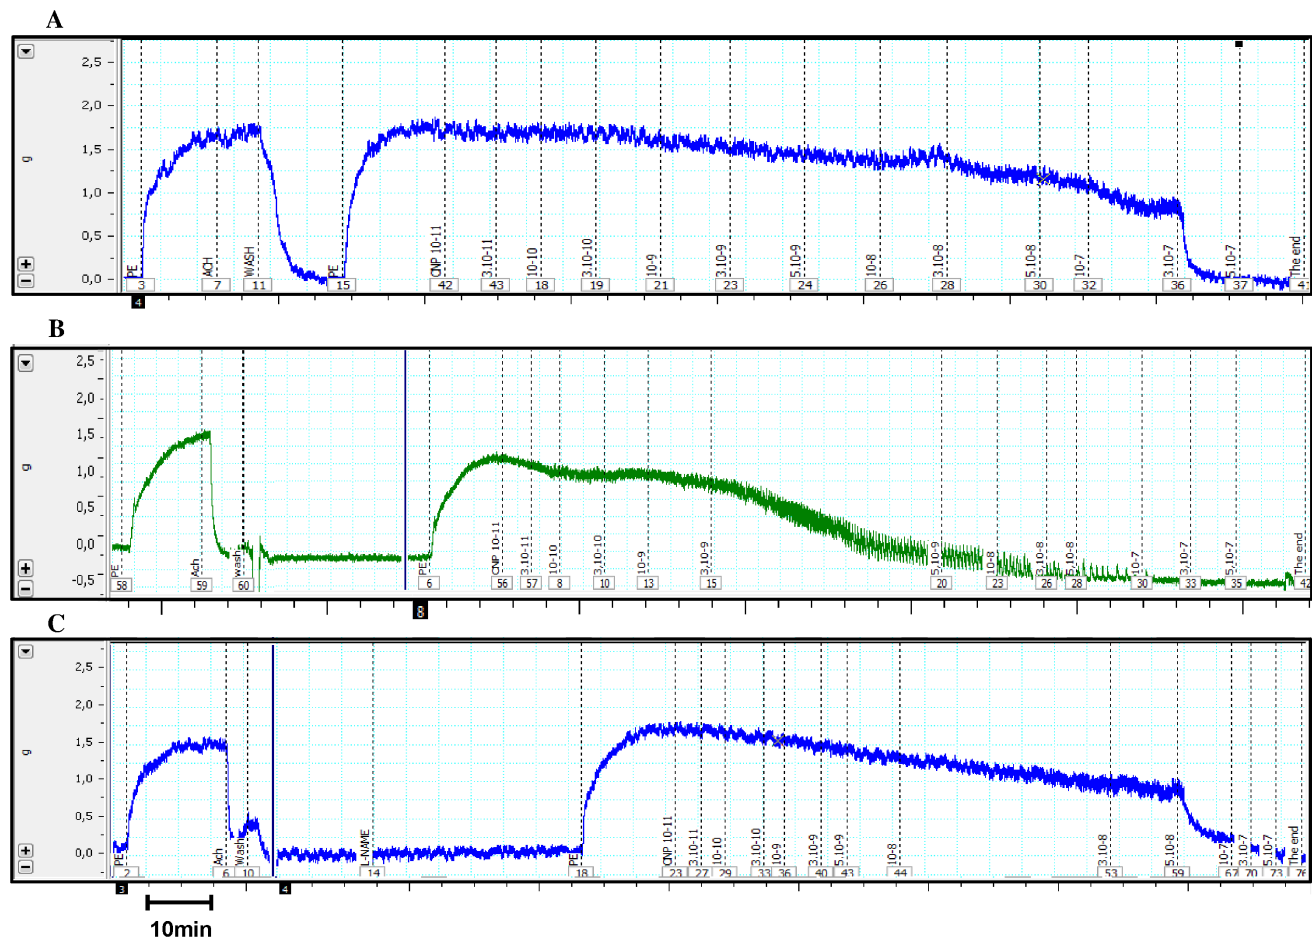

**Figure 2. Representative tracings showing the amplitude of the pre-contraction induced by phenylephrine and the profile of relaxation induced by CNP.** A) In endothelium-denuded aortic rings B) Endothelium-intact aortic rings, C) Endothelium-intact aortic rings after incubation with L-NAME.  
doi:10.1371/journal.pone.0095446.g002

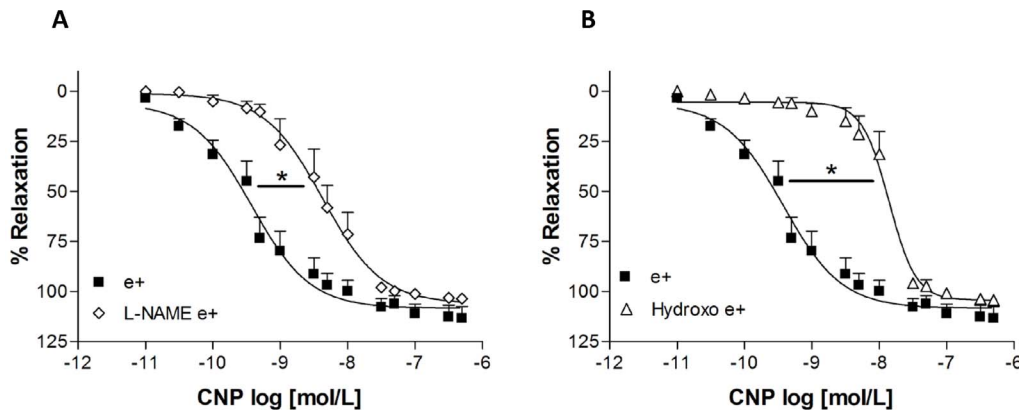

**Figure 3. Effects of L-NAME and hydroxocobalamin on the relaxation induced by CNP in intact endothelium aortic rings ( $e^+$ ).** Concentration-effect curves were constructed in the absence (control) or after incubation with these drugs for 30 minutes, L-NAME (100  $\mu\text{mol/L}$ ) (A) and hydroxocobalamin (Hydroxo, 10  $\mu\text{mol/L}$ ) (B). Responses are represented as the percentage of the relaxation induced by CNP on the contraction with phenylephrine (0.1  $\mu\text{mol/L}$ ). Data are means  $\pm$  SEM of five experiments. \* $P < 0.05$  for  $pD_2$  values was obtained with L-NAME or hydroxo vs. intact endothelium rat aortic rings ( $e^+$ ) (Student  $t$  test). doi:10.1371/journal.pone.0095446.g003

each other by their morphological differences. A major advantage of using the rat aorta artery segment was that  $\text{Ca}^{2+}$ -images of both vascular smooth muscle cells and endothelial cells were obtained simultaneously at one confocal plane. The cross section of rat aorta artery segments was observed by an optical microscope and with Fluo-3AM. Figure 5 shows  $\text{Ca}^{2+}$ -images of endothelial cells and vascular smooth muscle cells in rat aorta artery segment during the response to CNP that were selected and shown in pseudocolor. Changes in  $[\text{Ca}^{2+}]_c$  in representative endothelial cells (\* – black line) and vascular smooth muscle cells (\* – white line) were plotted as surface plot. Figure 5A (a–d) shows the surface plot profile obtained from a delimited area in endothelial cells during the time-scan in the response to CNP. Figure 5A (a1–d1) represents the surface plot of limited area of vascular smooth muscle cells. As shown in the Figure 5A, we used the scale bar

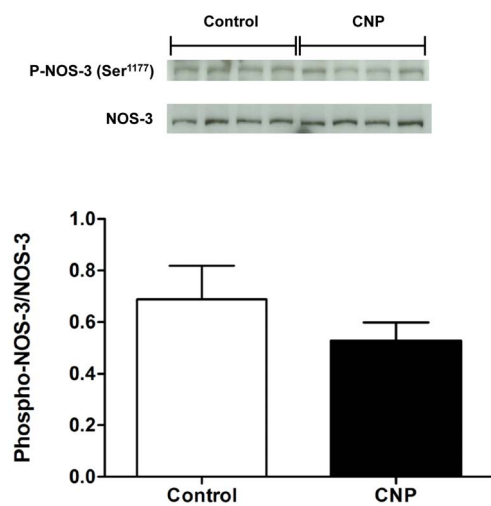

**Figure 4. Phosphorylation of NOS-3 in rat aorta.** Representative blots showing the protein expression of p-NOS-3-Ser<sup>1177</sup> after stimulation with vehicle (control) and CNP (0.3  $\mu\text{mol/L}$ ). Each lane represents the protein obtained from the homogenate of an independent rat aorta. Bars show the optic densitometry of the blots ( $n = 6-7/\text{group}$ ). doi:10.1371/journal.pone.0095446.g004

color (pseudocolor) in every single image. As shown in the Figure 5B, the addition of CNP (0.3  $\mu\text{M}$ ) produced an increase in  $[\text{Ca}^{2+}]_c$  in endothelial cells ( $\Delta\%FI = 28.47 \pm 4.92\%$ ,  $n = 3$ ) and a decrease in  $[\text{Ca}^{2+}]_c$  in vascular smooth muscle cells ( $\Delta\%FI = -30.04 \pm 3.26\%$ ,  $n = 3$ ).

## 5. Expression of NPR-C-receptors in Rat Aorta Artery

The presence of NPR-C-receptors was histologically analyzed in the cross-section preparations of the aortic rings, which contains the midregions of the arteries. Endothelial (black arrows) and adventitial (white arrows) staining for NPR-C-receptors were observed in rat aorta arteries. As shown in the Figure 6A, NPR-C receptors are localized in both endothelial cells and adventitial cells.

## Discussion

In the present study we demonstrated that the CNP-induced relaxation of aorta isolated from rats partially involves endothelial NO produced by NOS. Since pre-contraction with phenylephrine was similar in the presence and absence of endothelium, and also in intact-endothelium aortas after incubation with L-NAME, the same concentration of phenylephrine was used in all the vascular reactivity experiments. Removal of the aortic endothelium resulted in attenuation of the relaxant effect of CNP similar to that observed following blockade of NOS or intracellular NO scavenging. Furthermore, we showed that CNP is capable of increasing  $[\text{Ca}^{2+}]_c$  in endothelial cells to activate NOS and produce NO. This NO released from endothelial cells by diffusing into vascular smooth muscle cells was able of decreasing  $[\text{Ca}^{2+}]_c$  and to potentiate the CNP-induced aorta relaxation. Therefore, our findings are certainly relevant to the scenario of the cellular mechanisms involved in the NO pathway activation during the vascular relaxation induced by this peptide in intact conductance vessels.

Previous findings have demonstrated that the role of the endothelium in the CNP-induced vascular relaxation is controversial. It is known so far that CNP promotes relaxation in a manner independent of intact vascular endothelium in arteries [18,23,24] whereas in veins the endothelium appears to modulate negatively its relaxant effect [25]. In contrast to these studies, in the present work we observed that the CNP-induced relaxation of

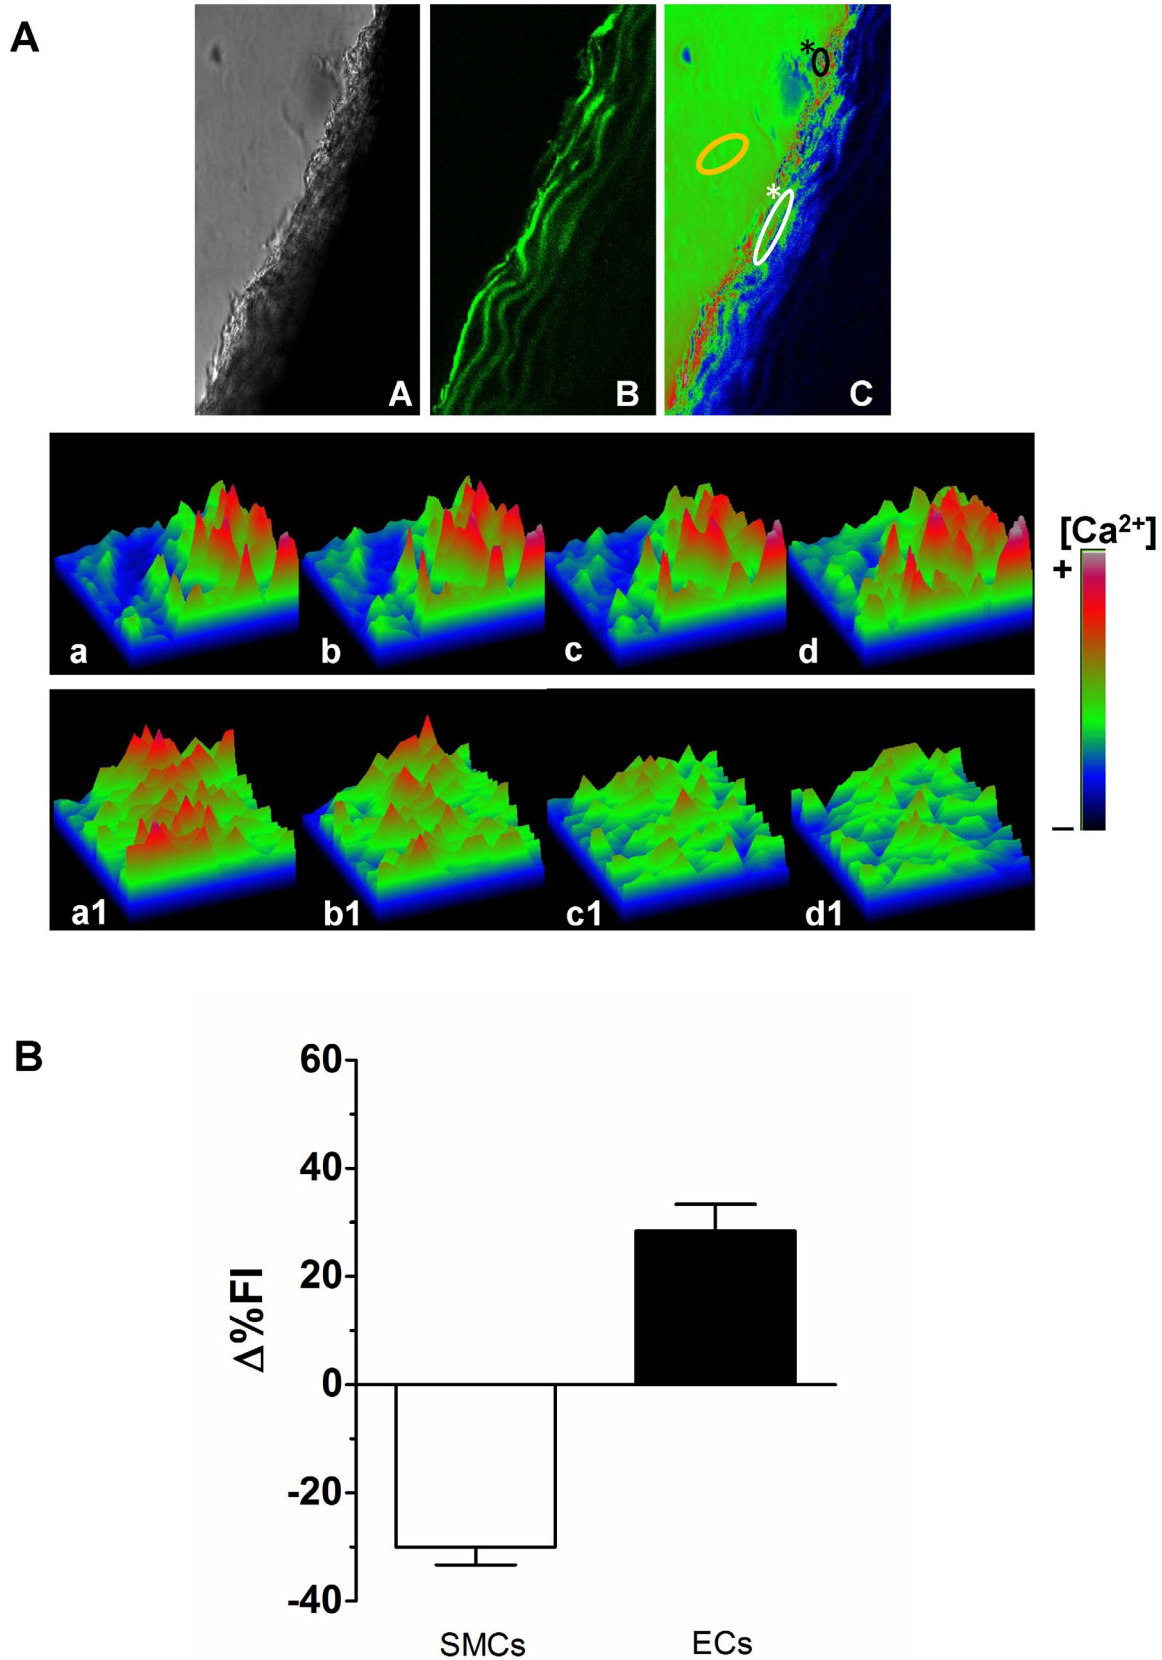

**Figure 5. Cytosolic  $Ca^{2+}$  increase in endothelial cells and cytosolic  $Ca^{2+}$  decrease in smooth muscle cells induced by CNP.** A) Aortic rings were preloaded with Fluo-3 AM and then stimulated with CNP (0.3  $\mu\text{mol/L}$ ). Serial  $Ca^{2+}$  images of Fluo-3 fluorescence in aortic segment were

recorded at the times (t) 0, 210, 410 and 610 seconds (s) after addition of CNP. A) image in differential contrast phase-DIC; B) image of Fluo-3 fluorescence and C) merged image in pseudocolor (\*black line ECs), (\*white line SMCs) and (\*yellow line arterial lumen). The effects of CNP were represented in surface plots of the endothelial cells (a–d) and the smooth muscle cells (a1–d1). The arbitrary intensity values from low to high  $[Ca^{2+}]_c$  are indicated by pseudocolor values. B) Effect of CNP (0.3  $\mu\text{mol/L}$ ) on average fluorescence intensity (% $\Delta\text{FI}$ ) of smooth muscle cells (SMCs) and endothelial cells (ECs) from aortic ring segment preloaded with Fluo-3 AM. doi:10.1371/journal.pone.0095446.g005

an intact conductance vessel, the aorta artery, involves an endothelial element since CNP was substantially less potent to promote relaxation in the absence of the endothelium. In this sense, similar results have been also shown by Brunner and Wolkart [18] in resistance arteries in which the endothelium was able to positively modulate the CNP-induced relaxation. Moreover, Sabrane et al. [26] demonstrated that the vascular endothelium is critically involved in the hypotensive and hypovolemic actions of ANP.

In this work, we provide consistent evidence that the endothelial element that positively modulate the CNP-induced relaxation is likely to be NO because the inhibition of NOS with L-NAME and the pre-incubation with an intracellular scavenger of NO resulted in attenuation that was similar to the relaxation observed in the absence of endothelium. The concentrations of L-NAME and hydroxocobalamin used in this work were also able to attenuate the vasorelaxant activity of the NO donor sodium nitroprusside in rat aorta [27] as well as acetylcholine [28]. Is well known, the production of NO in endothelial cells (ECs) is mainly generated

through activation of endothelial NOS (NOS-3). ECs-derived NO subsequently activates sGC to elevate the production of cGMP and decrease  $[Ca^{2+}]_c$  due to the activation of many proteins by phosphorylation resulting in vascular relaxation [29,1]. Several groups have shown that peptides ANP and CNP are able to induce activation of NOS-3 in distinct preparations contributing to the vascular effects mediated by these peptides [30,21,31,32]. However, in contrast to the other authors that showed that the blockade of NOS in isolated arteries did not affect [33] or potentiate [34] the CNP-induced relaxation. Although the exact reason for this discrepancy between our study and those ones is not clear, this may be due to differences in the species used in the experimental design adopted and/or in the vascular segments that were studied.

With regard to NOS-3 activation, it is known that such activation can be modulated through kinase-dependent signaling pathways that involve phosphorylation of the residues Thr<sup>495</sup>, Ser<sup>615/617</sup>, Ser<sup>633/635</sup>, or Ser<sup>1177/1179</sup> that play an important role in the regulation of its enzymatic activity in ECs [35,36,37]. However, Ser<sup>1177</sup> appears to be the most important among the NOS-3 phosphorylation sites because most stimuli that promote its activation are observed to cause phosphorylation of this site. Thus, the role of CNP on NOS-3 activation was evaluated by measuring NOS-3 phosphorylation at Ser<sup>1177</sup>. However, our results showed that phosphorylation of NOS-3 at activation residue Ser<sup>1177</sup> did not change after stimulation with CNP leading us to suggest that NOS-3 activation mediated through kinase-dependent signaling pathways, more specifically the phosphorylation of the residue Ser<sup>1177</sup>, is not the pathway involved in the NO production that contribute to the CNP-induced relaxant effect in aorta isolated from rats. In this regard, we cannot rule out the possibility that phosphorylation may occur in other residues of NOS-3 that also has been described to be able to decrease (Thr<sup>495/497</sup>) or increase (Ser<sup>635/633</sup>) the NOS-3 activity.

On the other hand, it is well established that the production of NO in endothelial cells by NOS-3 can also be  $Ca^{2+}$ /calmodulin-dependent [38,39]. It has been proposed that following a rise in  $[Ca^{2+}]_c$  in endothelial cells, NOS-3 dissociates from caveolin-1, allowing activation of the enzyme [40]. However, with respect to the CNP-induced NOS-3 activation mode, it is not yet quite clear how this happens in intact conductance vessels during the vascular relaxation. Interestingly, we showed in the present study an increase in  $[Ca^{2+}]_c$  in the endothelial cells followed by a decrease of  $[Ca^{2+}]_c$  in the vascular smooth muscle cells after the administration of CNP. This result leads us to suggest that CNP induce that increased  $[Ca^{2+}]_c$  in the endothelial cells could involve NO production since which was inhibited by L-NAME and NO scavenger hydroxocobalamin. This CNP effect possibly occurs through a receptor-dependent mechanism. This notion is further supported by previous findings that showed that increased NOS activity induced by CNP, ANP and cANP (4–23) in aorta tissue was blunted by the inhibitor of calmodulin and the blockade of  $Ca^{2+}$  influx [21,31] suggesting that the NOS activation induced by these peptides is mediated by a  $Ca^{2+}$ /calmodulin-dependent mechanism.

As to the subtype of the natriuretic receptor involved in this mechanism, it has been demonstrated that NOS-3 is activated by

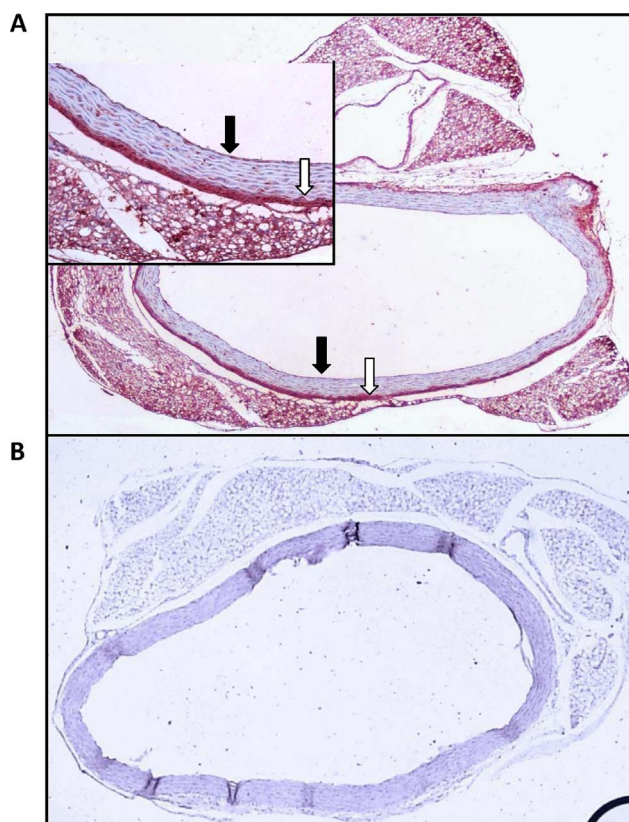

**Figure 6. Expression of NPR-C-receptor in rat aorta artery.** A) Representative photomicrography of an aortic ring showing endothelial (black arrows) and adventitial (white arrows) immunohistochemical staining for NPR-C receptor ( $\times 100$ , and inset  $\times 400$ ). B) Representative photomicrography of an aortic ring showing negative control immunohistochemical staining for NPR-C receptor. doi:10.1371/journal.pone.0095446.g006

G protein coupled to NPR-C in gastrointestinal smooth muscle and this effect is dependent on  $\text{Ca}^{2+}$  influx [30]. A similar conclusion was reached by other authors in rat coronary microvasculature [18], in aortic tissue [21,31] and aorta artery from normotensive and spontaneously hypertensive rats stimulated with ANP [41]. Additionally, specific NPR-C receptor agonist, cANP (4–23), was capable of inducing an increase in NOS activity in aorta, heart and kidney [21]. Considering that the NPR-C activation triggers a signaling cascade that involves  $\text{Ca}^{2+}$  influx dependent on the activation of inhibitory G protein (Gi) and/or phospholipase C (PLC) [19], our data suggest that NPR-C receptor would be the receptor involved in NOS-3 activation induced by CNP in aorta isolated. Through stimulation of  $\text{Ca}^{2+}$  influx in endothelial cells, CNP would induce an activation of NOS-3 leading to NO release and consequently relaxation of the vascular smooth muscle cells. This hypothesis was best supported by our result with immunohistochemical staining demonstrating that the NPR-C receptor is expressed in endothelial cells of aorta isolated from rats although further studies are necessary to elucidate the involvement of this receptor from a functional standpoint.

## References

- Moncada S, Palmer RM, Higgs EA (1991) Nitric oxide: physiology, pathophysiology and pharmacology. *Pharmacol Rev* 43: 109–142.
- Wilkins MR, Redondo J, Brown LA (1997) The natriuretic peptide family. *Lancet* 349: 1307–1310.
- Chen HH, Burnett Jr JC (1998) C-type natriuretic peptide: the endothelial component of the natriuretic peptide system. *J Cardiovasc Pharmacol* 32: S22–S28.
- Woodard GE, Rosado JA (2008) Natriuretic peptides in vascular physiology and pathology. *Int Rev Cell Mol Biol* 268: 59–93.
- Ahluwalia A, MacAllister RJ, Hobbs AJ (2004) Vascular actions of natriuretic peptides. *Basic Res Cardiol* 99: 83–89.
- Pandey KN (2005) Biology of natriuretic peptides and their receptors. *Peptides* 26: 901–932.
- Potter LR, Abbey-Hosch S, Dickey DM (2006) Natriuretic peptides, their receptors, and cyclic guanosine monophosphate-dependent signaling functions. *Endocr Rev* 27: 47–72.
- Anand-Srivastava MB, Sehl PD, Lowe DG (1996) Cytoplasmic domain of natriuretic peptide receptor-C inhibits adenyl cyclase. *J Biol Chem* 271: 19324–19329.
- Pagano M, Anand-Srivastava MB (2001) Cytoplasmic domain of natriuretic peptide receptor C constitutes Gi activators sequences that inhibit adenyl cyclase activity. *J Biol Chem* 276: 22064–22070.
- Palmer RMJ, Ferrige AG, Moncada S (1987) Nitric oxide release accounts for the biological activity of endothelial-derived relaxing factor. *Nature* 327: 534–536.
- Rand MJ (1992) Nitroergic transmission: nitric oxide as a mediator of non-adrenergic, noncholinergic neuro-effector transmission. *Clin Exp Pharmacol Physiol* 19: 147–169.
- Blatter LA, Taha Z, Mesaros S, Shacklock PS, Wier WG, et al. (1995) Simultaneous measurements of  $\text{Ca}^{2+}$  and nitric oxide in bradykinin-stimulated vascular endothelial cells. *Circ Res* 76: 922–924.
- Fleming I, Busse R (2003) Molecular mechanisms involved in the regulation of the endothelial nitric oxide synthase. *Am J Physiol* 284: R1–R12.
- Fulton D, Gratton JP, Sessa WC (2001) Post-translational control of endothelial nitric oxide synthase: why isn't calcium/calmodulin enough? *J Pharmacol Exp Ther* 299: 818–824.
- Mount PF, Kemp BE, Power DA (2007) Regulation of endothelial and myocardial NO synthesis by multi-site eNOS phosphorylation. *J Mol Cell Cardiol* 42: 271–279.
- Lincoln TM (1989) Cyclic GMP and mechanisms of vasodilation. *Pharmacol Ther* 41: 479–502.
- Amin J, Carretero OA, Ito S (1996) Mechanisms of action of atrial natriuretic factor and C-type natriuretic peptide. *Hypertension* 27: 684–687.
- Brunner F, Wolkart G (2001) Relaxant effect of C-type natriuretic peptide involves endothelium and nitric oxide-cGMP system in rat coronary microvasculature. *Cardiovasc Res* 51: 577–584.
- Murthy KS, Teng BQ, Zhou H, Jin JG, Grider JR, et al. (2000) Gi-1/Gi-2-dependent signaling by single-transmembrane natriuretic peptide clearance receptor. *Am J Physiol Gastrointest Liver Physiol* 278: G974–G980.

## Conclusions

Our findings suggest that the CNP-induced relaxation in intact aorta isolated from rats involves NO production in endothelial cells. The major novel finding of this study was that in a conductance vessel the CNP-induced NO production is due to  $[\text{Ca}^{2+}]_c$  increase in endothelial cells possibly through NPR-C activation expressed in these cells. These results may be construed as an important step in the understanding of the possible cross-talk between CNP and NO.

## Acknowledgments

This study was supported by FAPESP (Fundação de Apoio a Pesquisa do Estado de São Paulo), CNPq/Brazil (Conselho Nacional de Desenvolvimento Científico e Tecnológico) and CAPES (Coordenação de Aperfeiçoamento de Pessoal de Nível Superior).

## Author Contributions

Conceived and designed the experiments: FAA CBAR MDG LNZR LMB. Performed the experiments: FAA CBAR MDG LNZR. Analyzed the data: FAA CBAR MDG LNZR LMB. Contributed reagents/materials/analysis tools: FAA LNZR LMB. Wrote the paper: FAA CBAR MDG LNZR LMB.

- Costa MA, Elesgaray R, Balaszczuk AM, Arranz C (2006) Role of NPR-C natriuretic receptor in nitric oxide system activation induced by atrial natriuretic peptide. *Regul Pept* 135: 63–68.
- Costa MA, Elesgaray R, Caniffi C, Fellet A, Arranz C (2007) Role of cardiovascular nitric oxide system on C-type natriuretic peptide effects. *Biochem Biophys Res Commun* 359: 180–186.
- Bradford MM (1976) A rapid and sensitive method for the quantitation of microgram quantities of protein utilizing the principle of protein-dye binding. *Anal Biochem* 72: 248–254.
- Wei CM, Hu S, Miller VM, Burnett Jr, JC (1994) Vascular actions of C-type natriuretic peptide in isolated porcine coronary arteries and coronary vascular smooth muscle cells. *Biochem Biophys Res Commun* 205: 765–771.
- Janki A, Oscar AC, Sadayoshi I (1996) Mechanisms of Action of Atrial Natriuretic Factor and C-Type Natriuretic Peptide. *Hypertension* 27: 684–687.
- Wei CM, Aarhus LL, Miller VM, Burnett Jr, JC (1993) Action of C-type natriuretic peptide in isolated canine arteries and veins. *Am J Physiol* 264: H71–H73.
- Sabrane K, Kruse MN, Fabritz L, Zetsche B, Mitko D, et al. (2005) Vascular endothelium is critically involved in the hypotensive and hypovolemic actions of atrial natriuretic peptide. *J Clin Invest* 115(6): 1666–1674.
- Bonaventura D, de Lima RG, Vercesi JA, da Silva RS, Bendhack LM (2007) Comparison of the mechanisms underlying the relaxation induced by two nitric oxide donors: sodium nitroprusside and a new ruthenium complex. *Vasc Pharmacol* 46 (3): 215–222.
- Ajaya M, Francis I, Achikeb FI, Mustafaa MR (2007) Modulation of vascular reactivity in normal, hypertensive and diabetic rat aortae by a non-antioxidant flavonoid. *Pharmacological Research* 55: 385–391.
- Ignarro LJ (1990) Nitric oxide A novel signal transduction mechanism for transcellular communication. *Hypertension* 16: 477–483.
- Murthy KS, Teng B, Jin J, Makhlof M (1998) G protein-dependent activation of smooth muscle eNOS via natriuretic peptide clearance receptor. *Am J Physiol* 275: C1409–1416.
- Elesgaray R, Caniffi C, Rodriguez Ierace D, Visintini Jaime MF, Fellet A, et al. (2008) Signaling cascade that mediates endothelial nitric oxide synthase activation induced by atrial natriuretic peptide. *Regul Pept* 151: 130–134.
- Costa MA, Elesgaray R, Caniffi C, Fellet A, Mac Laughlin M, et al. (2010) Role of nitric oxide as a key mediator on cardiovascular actions of atrial natriuretic peptide in spontaneously hypertensive rats. *Am J Physiol Heart Circ Physiol* 298: H778–786.
- Wright RS, Wei CM, Kim CH, Kinoshita M, Matsuda Y, et al. (1996) C-type natriuretic peptide-mediated coronary vasodilation: Role of the coronary nitric oxide and particulate guanylate cyclase systems. *J Am Coll Cardiol* 28: 1031–1038.
- Madhani M, Scotland RS, MacAllister RJ, Hobbs AJ (2003) Vascular natriuretic peptide receptor-linked particulate guanylate cyclases are modulated by nitric oxide-cyclic GMP signalling. *Br J Pharmacol* 139: 1289–1296.
- Bauer PM, Fulton D, Boo YC, Sorescu GP, Kemp BE, et al. (2003) Compensatory phosphorylation and protein-protein interactions revealed by loss of function and gain of function mutants of multiple serine phosphorylation sites in endothelial nitric-oxide synthase. *J Biol Chem* 278: 14841–14849.



36. Michell BJ, Harris MB, Chen ZP, Ju H, Venema VJ, et al. (2001) Identification of regulatory sites of phosphorylation of the bovine endothelial nitric-oxide synthase at serine 617 and serine 635. *J Biol Chem* 277: 42344–42351.
37. Matsubara M, Hayashi N, Jing T, Titani K (2003) Regulation of endothelial nitric oxide synthase by protein kinase C. *J Biochem* 133: 773–781.
38. Busse R, Mülsch A (1990) Calcium-dependent nitric oxide synthesis in endothelial cytosol is mediated by calmodulin. *FEBS Lett* 265: 133–136.
39. Michel JB, Feron O, Sacks D, Michel T (1997) Reciprocal regulation of endothelial nitric oxide synthase by  $Ca^{2+}$ -calmodulin and caveolin. *J Biol Chem* 272: 15583–15586.
40. Figueroa XF, González DR, Martínez AD, Durán WN, Boric MP (2002) Ach induced endothelial NO synthase translocation, NO release and vasodilatation in the hamster microcirculation in vivo. *J Physiol* 544: 883–896.
41. Canifil <http://www.sciencedirect.com/science/article/pii/S0196978110001294> - afl C, Elesgaray R, Gironacci M, Arranz C, Costa MA (2010) C-type natriuretic peptide effects on cardiovascular nitric oxide system in spontaneously hypertensive rats. *Peptides* 31: 1309–1318.
